# Supplementary material
Source: ML conference proceedings conference paper supplement (https://openaccess.thecvf.com/content/CVPR2022/html/Liu_Reduce_Information_Loss_CVPR_2022_paper.html)
Supplement: Supplementary file 1 [file Liu_Reduce_Information_Loss_CVPR_2022_supplemental.pdf]

# Reduce Information Loss in Transformers for Pluralistic Image Inpainting

## Supplementary Material

Qiankun Liu<sup>1\*</sup> Zhentao Tan<sup>1</sup> Dongdong Chen<sup>2</sup> Qi Chu<sup>1†</sup> Xiyang Dai<sup>2</sup>

Yinpeng Chen<sup>2</sup> Mengchen Liu<sup>2</sup> Lu Yuan<sup>2</sup> Nenghai Yu<sup>1</sup>

<sup>1</sup>University of Science and Technology of China

<sup>2</sup>Microsoft Cloud + AI

{liuqk3, tzt}@mail.ustc.edu.cn, {qchu, ynh}@ustc.edu.cn

cddlyf@gmail.com, {xiyang.dai, yiche, mengchliu, luyuan}@microsoft.com

### 1. Overview

In this supplementary material, we provide more implementation details, experimental results and analysis, including:

- training of P-VQVAE (Section 2).
- sampling strategy for image inpainting (Section 3).
- network architecture of different models (Section 4).
- more results on different datasets (Section 5).
- more discussions on PUT (Section 6), including the inference speed of PUT and some artifacts in inpainted results.

### 2. Training of P-VQVAE

Given an image  $\mathbf{x}$  and two different masks  $\mathbf{m}$  and  $\mathbf{m}'$ , the input of P-VQVAE is  $\hat{\mathbf{x}} = \mathbf{x} \otimes \mathbf{m}$ . The overall loss for the training of P-VQVAE is:

$$L_{vae} = \mathcal{L}_{rec}(\hat{\mathbf{x}}, \hat{\mathbf{x}}^R) + \|\text{sg}[\hat{\mathbf{f}}] \ominus \hat{\mathbf{e}}\|_2^2 + \beta \|\text{sg}[\hat{\mathbf{e}}] \ominus \hat{\mathbf{f}}\|_2^2, \quad (1)$$

where  $\hat{\mathbf{f}} = \mathcal{E}(\hat{\mathbf{x}})$  denotes the feature vectors extracted by the encoder and  $\hat{\mathbf{e}}$  is quantized vectors for  $\hat{\mathbf{f}}$ .  $\hat{\mathbf{x}}^R = \mathcal{D}(\hat{\mathbf{e}}, \mathbf{m} \otimes \mathbf{m}', \hat{\mathbf{x}} \otimes \mathbf{m}')$  is the reconstructed image and  $\text{sg}[\cdot]$  refers to a stop-gradient operation that blocks gradients from flowing into its argument.

The last term in Eq. (1) is the so-called *commitment loss* [15] with weighting factor  $\beta = 0.25$ . It is responsible for passing gradient information from decoder to encoder. The second term in Eq. (1) is the codebook loss for the optimization of latent vectors. Following previous works in [13, 15], we replace the second term with the Exponential

---

#### Algorithm 1: Sampling Strategy for Pluralistic Image Inpainting

---

**Input :**  $\hat{\mathbf{x}} \in \mathbb{R}^{H \times W \times 3}$ : masked image needs to be inpainted  
 $\mathbf{m} \in \{0, 1\}^{H \times W \times 3}$ : the mask indicating whether a pixel is masked/missing or not  
 $\mathcal{K}$ : top- $\mathcal{K}$  for Gibbs sampling  
**Output:**  $\hat{\mathbf{x}}^I \in \mathbb{R}^{H \times W \times 3}$ : the inpainted image

- 1 **Step1:** get indicator mask, feature vectors, quantized tokens
- 2  $\mathbf{m}^\downarrow \in \{0, 1\}^{\frac{H}{r} \times \frac{W}{r} \times 1}$ : calculated from  $\mathbf{m}$
- 3  $\hat{\mathbf{f}} \in \mathbb{R}^{\frac{H}{r} \times \frac{W}{r} \times C} \leftarrow \mathcal{E}(\hat{\mathbf{x}})$
- 4  $\hat{\mathbf{t}} \in \mathbb{N}^{\frac{H}{r} \times \frac{W}{r}} \leftarrow \mathcal{I}(\hat{\mathbf{f}}, \mathbf{e}, \mathbf{e}', \mathbf{m}^\downarrow)$  // Sec. 3.1 in the paper
- 5  $\hat{\mathbf{t}}^I \leftarrow \hat{\mathbf{t}}$
- 6 **Step2:** sample tokens for masked patches
- 7 **while**  $\sum_{i,j} \mathbf{m}_{i,j}^\downarrow < \frac{HW}{r^2}$  **do**
- 8      $\hat{\mathbf{p}} \in [0, 1]^{\frac{H}{r} \times \frac{W}{r} \times K} \leftarrow \mathcal{T}(\hat{\mathbf{f}})$  // probabilities, Sec. 3.2 in the paper
- 9     // select the patch with maximum probability
- 10     $i', j' \leftarrow \text{argmax}_{i,j} (1 - \mathbf{m}_{i,j}^\downarrow) \cdot \max \hat{\mathbf{p}}_{i,j,:}$
- 11    // sample the token from the top- $\mathcal{K}$  elements in  $\hat{\mathbf{p}}_{i',j',:}$
- 12     $k \leftarrow \text{GIBBSAMPLING}(\hat{\mathbf{p}}_{i',j',:}, \mathcal{K})$
- 13    // update some variables
- 14     $\hat{\mathbf{t}}_{i',j'}^I \leftarrow k, \mathbf{m}_{i',j'}^\downarrow \leftarrow 1, \hat{\mathbf{f}}_{i',j'} \leftarrow \mathbf{e}_k$
- 15 **Step3:** reconstruct the image
- 16  $\hat{\mathbf{e}}^I \leftarrow \text{VECTORRETRIEVAL}(\hat{\mathbf{t}}^I, \mathbf{e})$
- 17  $\hat{\mathbf{x}}^I \leftarrow \mathcal{D}(\hat{\mathbf{e}}^I, \mathbf{m}, \hat{\mathbf{x}})$
- 18 **Return**  $\hat{\mathbf{x}}^I$

---

Moving Average (EMA) to optimize  $\mathbf{e}$  and  $\mathbf{e}'$ . Specifically, at each iteration  $t$ , the latent vector  $\mathbf{e}_k$  is updated as:

$$\begin{cases} n_k^t = n_k^{t-1} * \gamma + n_k * (1 - \gamma), \\ \bar{\mathbf{e}}_k^t = \bar{\mathbf{e}}_k^{t-1} * \gamma + \sum_j^{n_k} (\hat{\mathbf{f}}^k)_j * (1 - \gamma), \\ \mathbf{e}_k^t = \frac{\bar{\mathbf{e}}_k^t}{n_k^t}, \end{cases} \quad (2)$$

where  $\hat{\mathbf{f}}^k$  denotes the set of feature vectors in  $\hat{\mathbf{f}}$  that assigned to  $\mathbf{e}_k$  and  $n_k$  is the number of feature vectors in  $\hat{\mathbf{f}}^k$ .  $\gamma$  is the

\*Work done during an internship at Microsoft

†Corresponding author

| Module  | Layer             | Parameter size / Stride                                                                                                                  | Output size                   |
|---------|-------------------|------------------------------------------------------------------------------------------------------------------------------------------|-------------------------------|
| P-Enc   | Linear            | $192 \times 256$                                                                                                                         | $32 \times 32 \times 256$     |
|         | Linear            | $\left( \begin{smallmatrix} 256 \times 128 \\ 128 \times 256 \end{smallmatrix} \right) \times 8$                                         | $32 \times 32 \times 256$     |
|         | ResBlock          | $256 \times 256$                                                                                                                         | $32 \times 32 \times 256$     |
| D-Codes | $\mathbf{e}$      | $512 \times 256$                                                                                                                         | -                             |
|         | $\mathbf{e}'$     | $512 \times 256$                                                                                                                         | -                             |
| MSG-Dec | Conv              | $256 \times 3 \times 3 \times 256/1$                                                                                                     | $32 \times 32 \times 256$     |
|         | Conv              | $\left( \begin{smallmatrix} 256 \times 3 \times 3 \times 128/1 \\ 128 \times 3 \times 3 \times 256/1 \end{smallmatrix} \right) \times 8$ | $32 \times 32 \times 256$     |
|         | Deconv            | $256 \times 4 \times 4 \times 256/2$                                                                                                     | $64 \times 64 \times 256$     |
|         | (Conv)            | $(256 \times 4 \times 4 \times 256/2)$                                                                                                   | $(32 \times 32 \times 256)$   |
|         | Deconv            | $256 \times 4 \times 4 \times 128/2$                                                                                                     | $128 \times 128 \times 128$   |
|         | (Conv)            | $(128 \times 4 \times 4 \times 256/2)$                                                                                                   | $(64 \times 64 \times 256)$   |
|         | Deconv            | $128 \times 4 \times 4 \times 64/2$                                                                                                      | $256 \times 256 \times 64$    |
|         | (Conv)            | $(64 \times 4 \times 4 \times 128/2)$                                                                                                    | $(128 \times 128 \times 128)$ |
|         | Conv <sup>†</sup> | $64 \times 3 \times 3 \times 3/1$                                                                                                        | $256 \times 256 \times 3$     |
|         | (Conv)            | $(3 \times 3 \times 3 \times 64/1)$                                                                                                      | $(256 \times 256 \times 64)$  |

Table 1. Architecture of P-VQVAE. For MSG-Dec, the bracketed layers in the bottom four rows denotes the layers in reference branch. Except the convolution layer marked by <sup>†</sup>, all the other layers are followed by a ReLU [9] activation function. The structure of Linear and Conv ResBlocks are shown in Figure 1.

| Module   | Layer    | Parameter size / Stride                                                                                                                  | Output size                |
|----------|----------|------------------------------------------------------------------------------------------------------------------------------------------|----------------------------|
| Conv-Enc | Conv     | $3 \times 4 \times 4 \times 64/2$                                                                                                        | $128 \times 128 \times 64$ |
|          | Conv     | $64 \times 4 \times 4 \times 128/2$                                                                                                      | $64 \times 64 \times 128$  |
|          | Conv     | $128 \times 4 \times 4 \times 256/2$                                                                                                     | $32 \times 32 \times 256$  |
|          | Conv     | $\left( \begin{smallmatrix} 256 \times 3 \times 3 \times 128/1 \\ 128 \times 3 \times 3 \times 256/1 \end{smallmatrix} \right) \times 8$ | $32 \times 32 \times 256$  |
|          | ResBlock | $256 \times 3 \times 3 \times 256$                                                                                                       | $32 \times 32 \times 256$  |

Table 2. Architecture of the encoder in P-VQVAE<sup>conv</sup>. The learnable codebook and decoder are the same with those in P-VQVAE in Table 1. All layers are followed by a ReLU [9] activation function.

decay parameter with the value between 0 and 1. We set  $\gamma = 0.99$  in all our experiments.

The first term in Eq. (1) is the reconstruction loss and  $\mathcal{L}_{rec}(\cdot, \cdot)$  is the function to get the difference between the inputted and reconstructed images. It consists of five parts, including L1 loss between the pixel values in two images (denoted as  $\mathcal{L}_{pixel}$ ) and the gradients of two images (denoted as  $\mathcal{L}_{grad}$ ), the adversarial loss [5]  $\mathcal{L}_{adv}$ , as well as the perceptual loss [7]  $\mathcal{L}_{perc}$  and style loss [4]  $\mathcal{L}_{style}$  between the two images. The design of the last three losses are inspired by the work in [10]. In the following, we describe the aforementioned losses in detail. Among them:

$$\mathcal{L}_{pixel} = \mathcal{M}(|\hat{\mathbf{x}} \ominus \hat{\mathbf{x}}^R|), \quad (3)$$

$$\mathcal{L}_{grad} = \mathcal{M}(|\text{grad}[\hat{\mathbf{x}}] \ominus \text{grad}[\hat{\mathbf{x}}^R]|), \quad (4)$$

where  $\mathcal{M}(\cdot)$  refers to a mean-value operation,  $\text{grad}[\cdot]$  is the function calculating the gradient of the given image.

The adversarial loss  $\mathcal{L}_{adv}$  is computed with the help of a

| Dataset      | $n'$ | $h$ | $D$  | $D'$ | Param. |
|--------------|------|-----|------|------|--------|
| FFHQ [8]     | 30   | 8   | 512  | 64   | 95.0M  |
| Places2 [18] | 35   | 8   | 512  | 64   | 110.7M |
| ImageNet [2] | 35   | 8   | 1024 | 128  | 441.7M |

Table 3. UQ-Transformer with different model sizes for different datasets.  $n'$  and  $h$  are the number of transformer block and attention head.  $D$  is the dimensionality of feature vectors that before and after each transformer block.  $D'$  is the dimensionality of feature vector in each attention head.

discriminator network  $\mathcal{D}_{adv}(\cdot)$ :

$$\mathcal{L}_{adv} = -\mathcal{M}(\log[1 \ominus \mathcal{D}_{adv}(\hat{\mathbf{x}}^R)]) - \mathcal{M}(\log[\mathcal{D}_{adv}(\hat{\mathbf{x}})]), \quad (5)$$

where  $\log[\cdot]$  denotes element-wise logarithm operation. The architecture of the discriminator network is the same with that in [10].

The conceptual loss  $\mathcal{L}_{perc}$  and style loss  $\mathcal{L}_{style}$  are computed based on the activation maps from VGG-19 [14]:

$$\mathcal{L}_{perc} = \sum_l^{L_{perc}} \mathcal{M}(|\phi_l(\hat{\mathbf{x}}) \ominus \phi_l(\hat{\mathbf{x}}^R)|) \quad (6)$$

$$\mathcal{L}_{style} = \sum_l^{L_{style}} \mathcal{M}(|\mathcal{G}(\phi_l(\hat{\mathbf{x}})) \ominus \mathcal{G}(\phi_l(\hat{\mathbf{x}}^R))|) \quad (7)$$

where  $\phi_l(\cdot)$  corresponds to different layers in VGG-19 [14],  $\mathcal{G}(\cdot)$  denotes the function that gets the Gram matrix of its argument. For  $\mathcal{L}_{perc}$  and  $\mathcal{L}_{style}$ , we set  $L_{perc} = \{\text{relu1\_1}, \text{relu2\_1}, \text{relu3\_1}, \text{relu4\_1}, \text{relu5\_1}\}$  and  $L_{style} = \{\text{relu2\_2}, \text{relu3\_4}, \text{relu4\_4}, \text{relu5\_2}\}$ . The overall reconstruction loss is:

$$\mathcal{L}_{rec} = \mathcal{L}_{pixel} + \lambda_g \mathcal{L}_{grad} + \lambda_a \mathcal{L}_{adv} + \lambda_p \mathcal{L}_{perc} + \lambda_s \mathcal{L}_{style} \quad (8)$$

In our implementation, we set  $\lambda_g = 5$ ,  $\lambda_a = 0.1$ ,  $\lambda_p = 0.1$  and  $\lambda_s = 250$ .

### 3. Sampling Strategy for Image Inpainting

The overall procedure can be divided into three steps: 1) get the feature vectors  $\hat{\mathbf{f}}$  from the masked image  $\hat{\mathbf{x}}$  using encoder and get the tokens  $\hat{\mathbf{t}}$  by quantizing  $\hat{\mathbf{f}}$  with latent vectors in dual-codebook. The tokens for masked patches are not required; 2) get the tokens for masked patches using transformer. Note that the tokens are iteratively sampled with Gibbs sampling following previous transformer-based works [3, 11, 12]; 3) retrieve quantized vectors  $\hat{\mathbf{e}}^I$  from codebook  $\mathbf{e}$  based on the tokens and reconstruct the inpainted image  $\hat{\mathbf{x}}^I$  using decoder by referencing to masked image  $\hat{\mathbf{x}}$ . The detailed sampling strategy is shown in Algorithm 1.

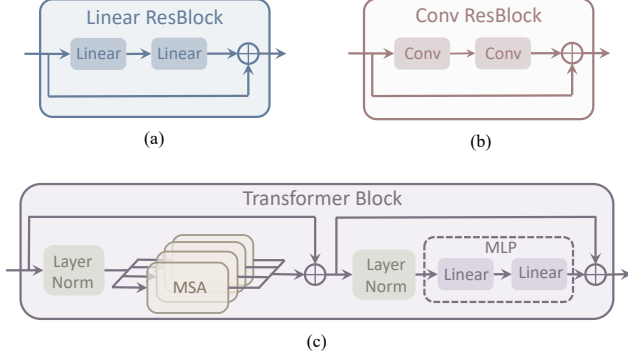

Figure 1. Architecture of different blocks. For Linear and Conv ResBlocks, each layer is followed by a ReLU [9] activation function. For transformer block, there is a GELU [6] activation function between the two linear layers. MSA: Multi-head Self-Attention. MLP: Multi-Layer Perceptron.

## 4. Network Architecture

### 4.1. Auto-Encoder

For different datasets, we use P-VQVAE with the same model size, and the architecture of our default P-VQVAE is shown in Table 1. The structure of Linear and Conv ResBlocks are shown in Figure 1 (a) and (b). In the paper, Section 4.3, several models are designed to show the effectiveness of different components in our method, including  $\text{PUT}^{\text{conv}}$ ,  $\text{PUT}^{\text{one}}$ ,  $\text{PUT}^{\text{no.ref}}$ ,  $\text{PUT}^{\text{qua0}}$  and  $\text{PUT}^{\text{tok}}$ . The auto-encoders in the last two models are the same with our default P-VQVAE. However, the auto-encoders in  $\text{PUT}^{\text{conv}}$ ,  $\text{PUT}^{\text{one}}$  and  $\text{PUT}^{\text{no.ref}}$  are different. For the auto-encoder in  $\text{PUT}^{\text{conv}}$  (denoted as  $\text{P-VQVAE}^{\text{conv}}$ ), all the linear layers in the encoder are replaced with convolution layers, and the input image is processed in a sliding window manner. Other modules in  $\text{P-VQVAE}^{\text{conv}}$  are the same with those in P-VQVAE. The architecture of encoder in  $\text{P-VQVAE}^{\text{conv}}$  (denoted as Conv-Enc) is shown in Table 2. The architecture of the auto-encoder in  $\text{PUT}^{\text{one}}$  is the same with P-VQVAE, except only one codebook  $\mathbf{e}$  is used for training and testing. While for the auto-encoder in  $\text{PUT}^{\text{no.ref}}$ , it can be obtained from P-VQVAE by removing the reference branch in decoder.

### 4.2. Transformer

The architecture of transformer block is depicted in Figure 1 (c). There are several (denoted as  $n'$ ) successive transformer blocks in UQ-Transformer. Within each transformer block, the input features will be enhanced by self-attention. Formally, let  $\tilde{\mathbf{f}} \in \mathbb{R}^{\frac{HW}{r^2} \times D}$  be the input of transformer block. At the  $b$ -th transformer block, the feature vectors

| Datasets                            | FFHQ [8] | Places2 [18] | ImageNet [2] |
|-------------------------------------|----------|--------------|--------------|
| Models                              |          |              |              |
| UQ-Transformer<br>(# tokens/second) | 37.138   | 32.048       | 17.186       |
| P-VQVAE<br>(# images/second)        | 62.949   |              |              |

Table 4. Inference speed of different models. Tested on RTX 3090. The time consumption of P-VQVAE includes extracting feature vectors from image, quantizing feature vectors to latent vectors, and reconstructing the input image.

are processed as:

$$\begin{aligned}\tilde{\mathbf{f}}^{b-1} &= \tilde{\mathbf{f}}^{b-1} + \text{MSA}(\text{LN}(\tilde{\mathbf{f}}^{b-1})), \\ \tilde{\mathbf{f}}^b &= \tilde{\mathbf{f}}^{b-1} + \text{MLP}(\text{LN}(\tilde{\mathbf{f}}^{b-1})),\end{aligned}\quad (9)$$

where  $\text{LN}(\cdot)$ ,  $\text{MLP}(\cdot)$ ,  $\text{MSA}(\cdot)$  denote layer normalization [1], multi-layer perceptron and multi-head self-attention respectively. More specifically, given input  $\mathbf{f} \in \mathbb{R}^{\frac{HW}{r^2} \times D}$ ,  $\text{MSA}(\cdot)$  could be formed as:

$$\begin{aligned}\mathbf{h}_j &= \text{softmax}\left(\frac{(\mathbf{f}\mathbf{w}_q^j)(\mathbf{f}\mathbf{w}_k^j)^T}{\sqrt{D'}}\right)(\mathbf{f}\mathbf{w}_v^j), \\ \text{MSA}(\mathbf{f}) &= [\mathbf{h}_0; \mathbf{h}_1; \dots; \mathbf{h}_{h-1}]\mathbf{w}_o,\end{aligned}\quad (10)$$

where  $h$  is the number of head,  $\mathbf{w}_q^j, \mathbf{w}_k^j, \mathbf{w}_v^j \in \mathbb{R}^{D \times D'}$ ,  $\mathbf{w}_o \in \mathbb{R}^{hD' \times D}$  are the learnable parameters.  $[\cdot; \dots; \cdot]$  is the operation that concatenates the given arguments along the last dimension. By changing the values of  $h, D, D'$  and  $n'$ , we can easily scale the size of UQ-Transformer.

We use UQ-Transformer with different model sizes for different datasets, which are shown in Table 3. As a reminder, the configuration of transformers are the same with those in ICT [17].

## 5. More Results

We show more qualitative comparisons for FFHQ [8] (Figure 3), Places2 [18] (Figure 4) and ImageNet [2] (Figure 5 and Figure 6).

## 6. More Discussions

**Inference speed.** As mentioned in Section 5 in the paper, the main limitation of PUT is the inference speed, which is also a common issue of existing transformer-based auto-regressive methods [3, 12, 16, 17]. Here we present the inference speed of PUT in Table 4. Note that the time consumption of inpainting a masked image depends on the area of masked regions.

**Artifacts.** We experimentally find that there sometimes contain some artifacts in the generated results of PUT, as

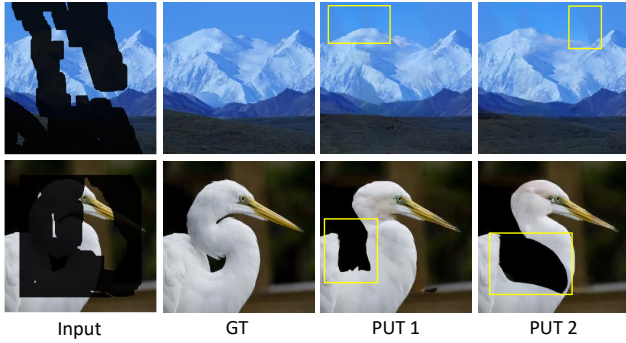

Figure 2. Results with artifacts. Top: color distortion. Bottom: black regions. Please pay attention to the contents in yellow rectangles.

shown in Figure 2. These artifacts can be divided into two categories. 1) Color distortion: the color of generated contents may not be consistent with the color of provided contents in the image. 2) Black region: PUT may produce black regions if the provided masked image contains lots of black pixels.



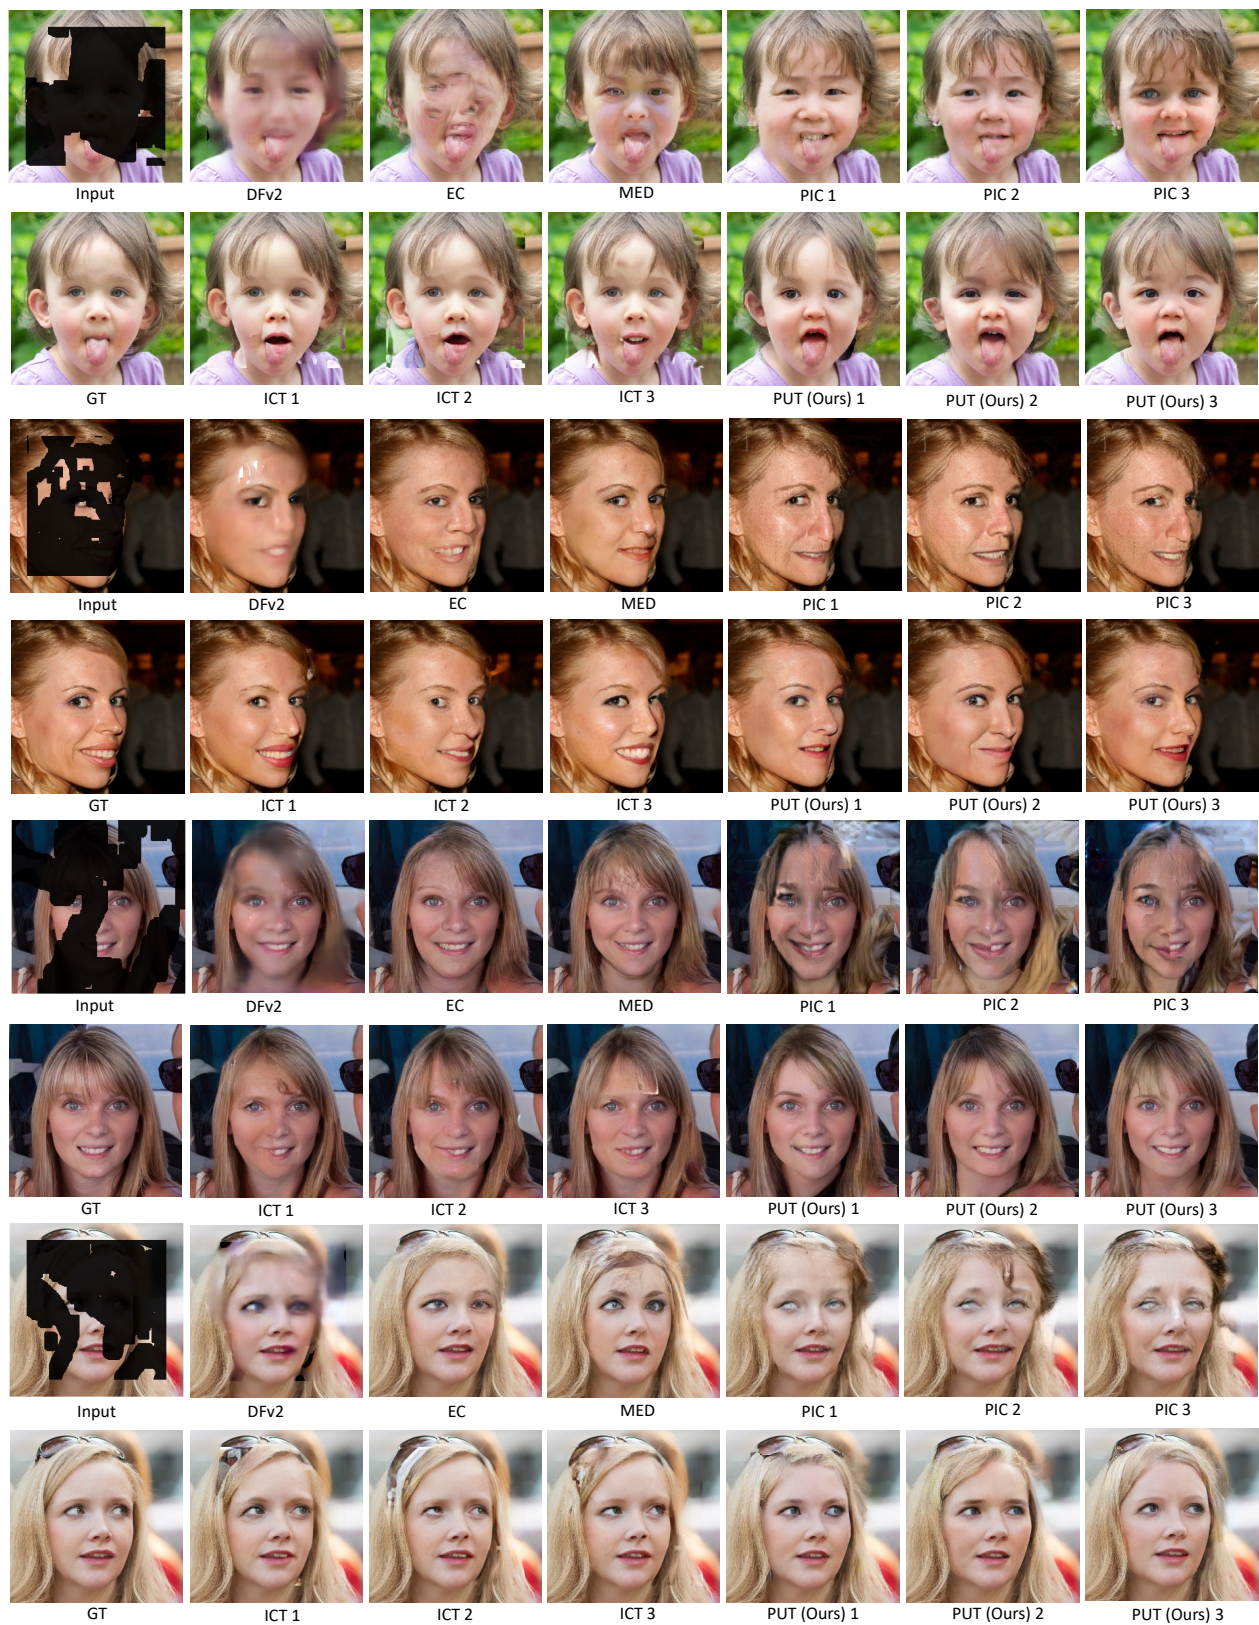

Figure 3. Qualitative comparisons between different methods on FFHQ [8].



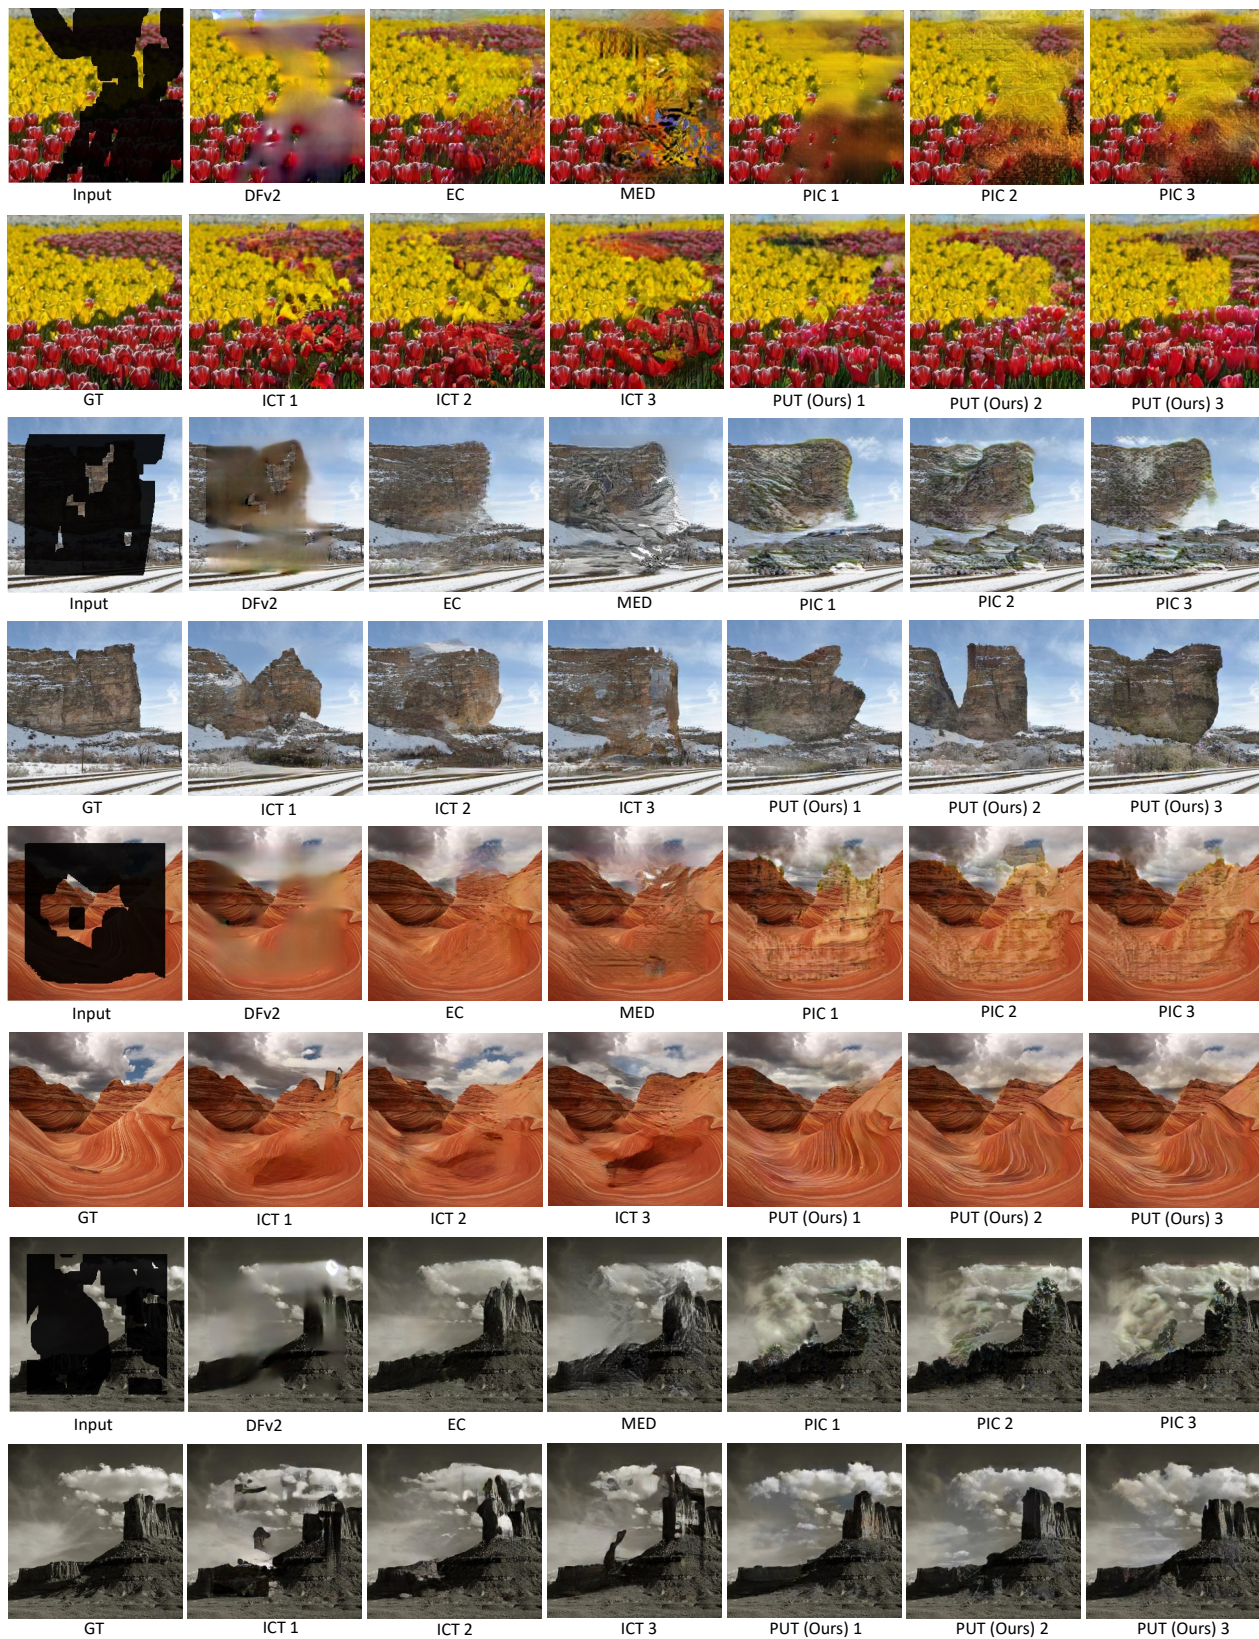

Figure 4. Qualitative comparisons between different methods on Places2 [18].



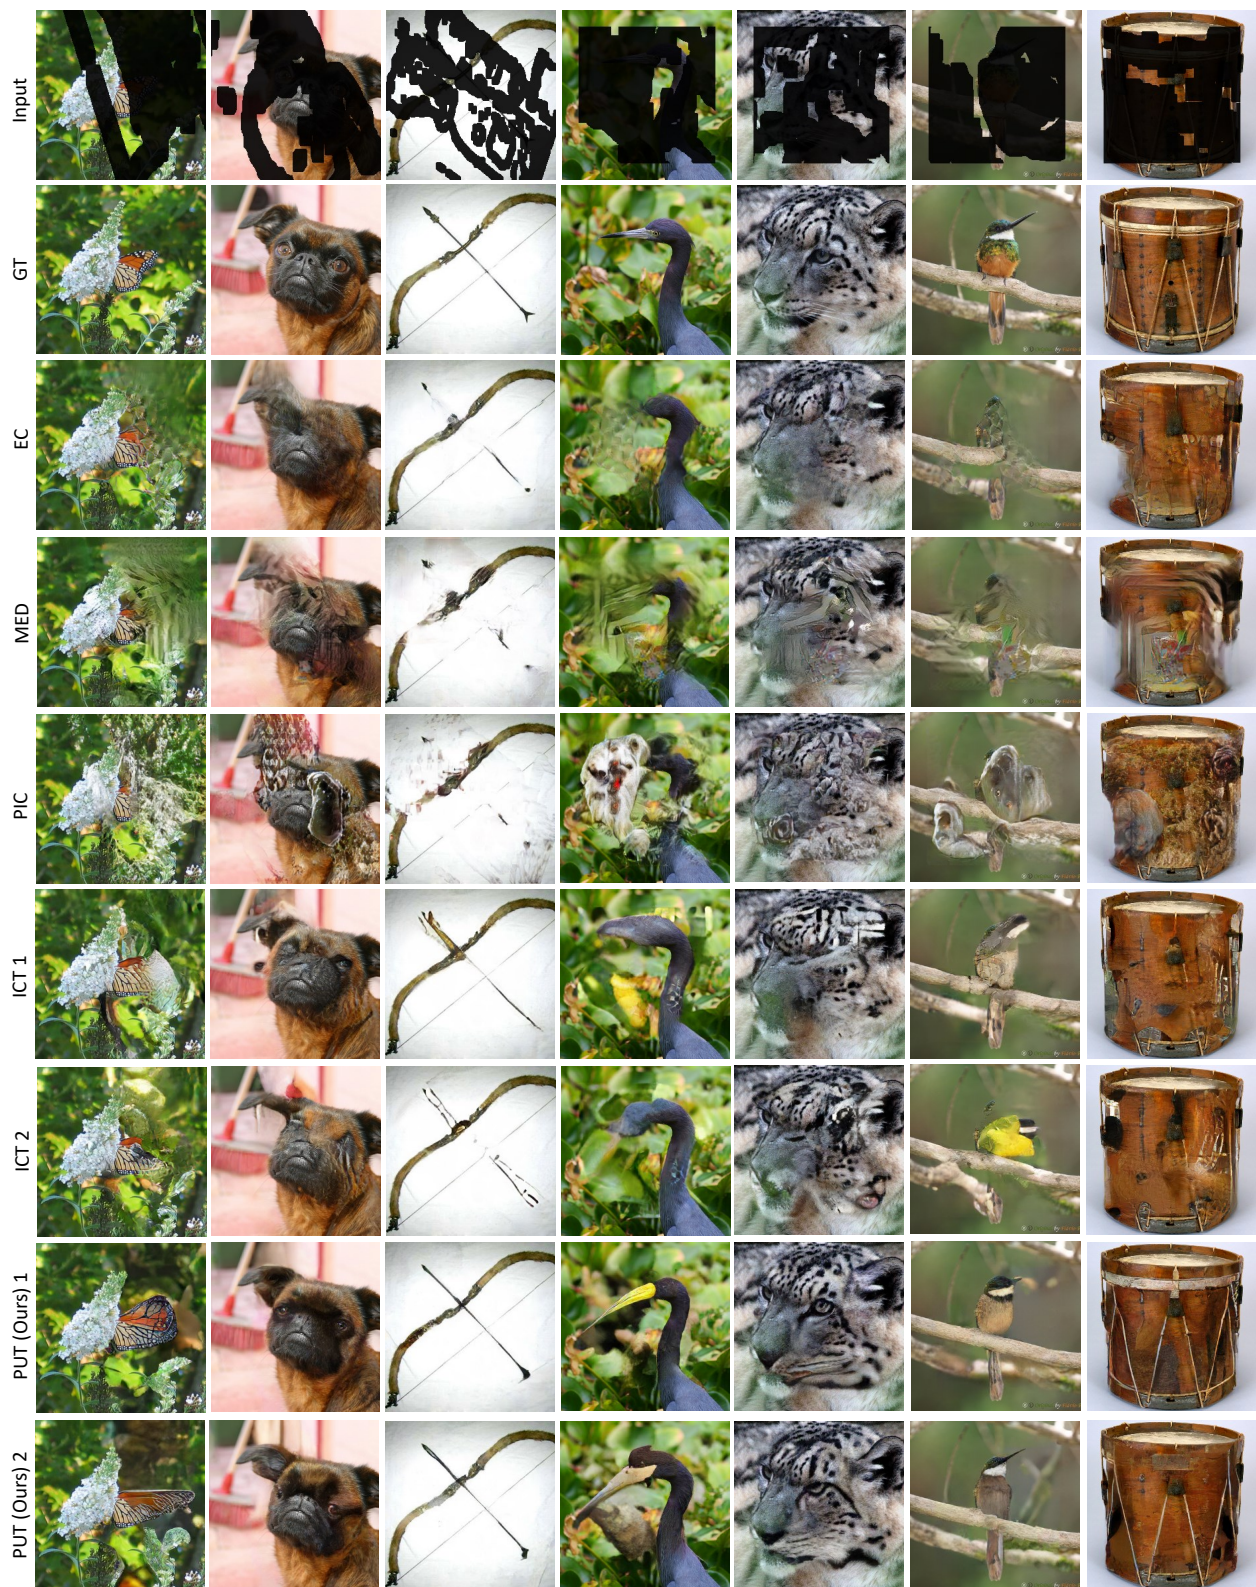

Figure 5. Qualitative comparisons between different methods on ImageNet [2].



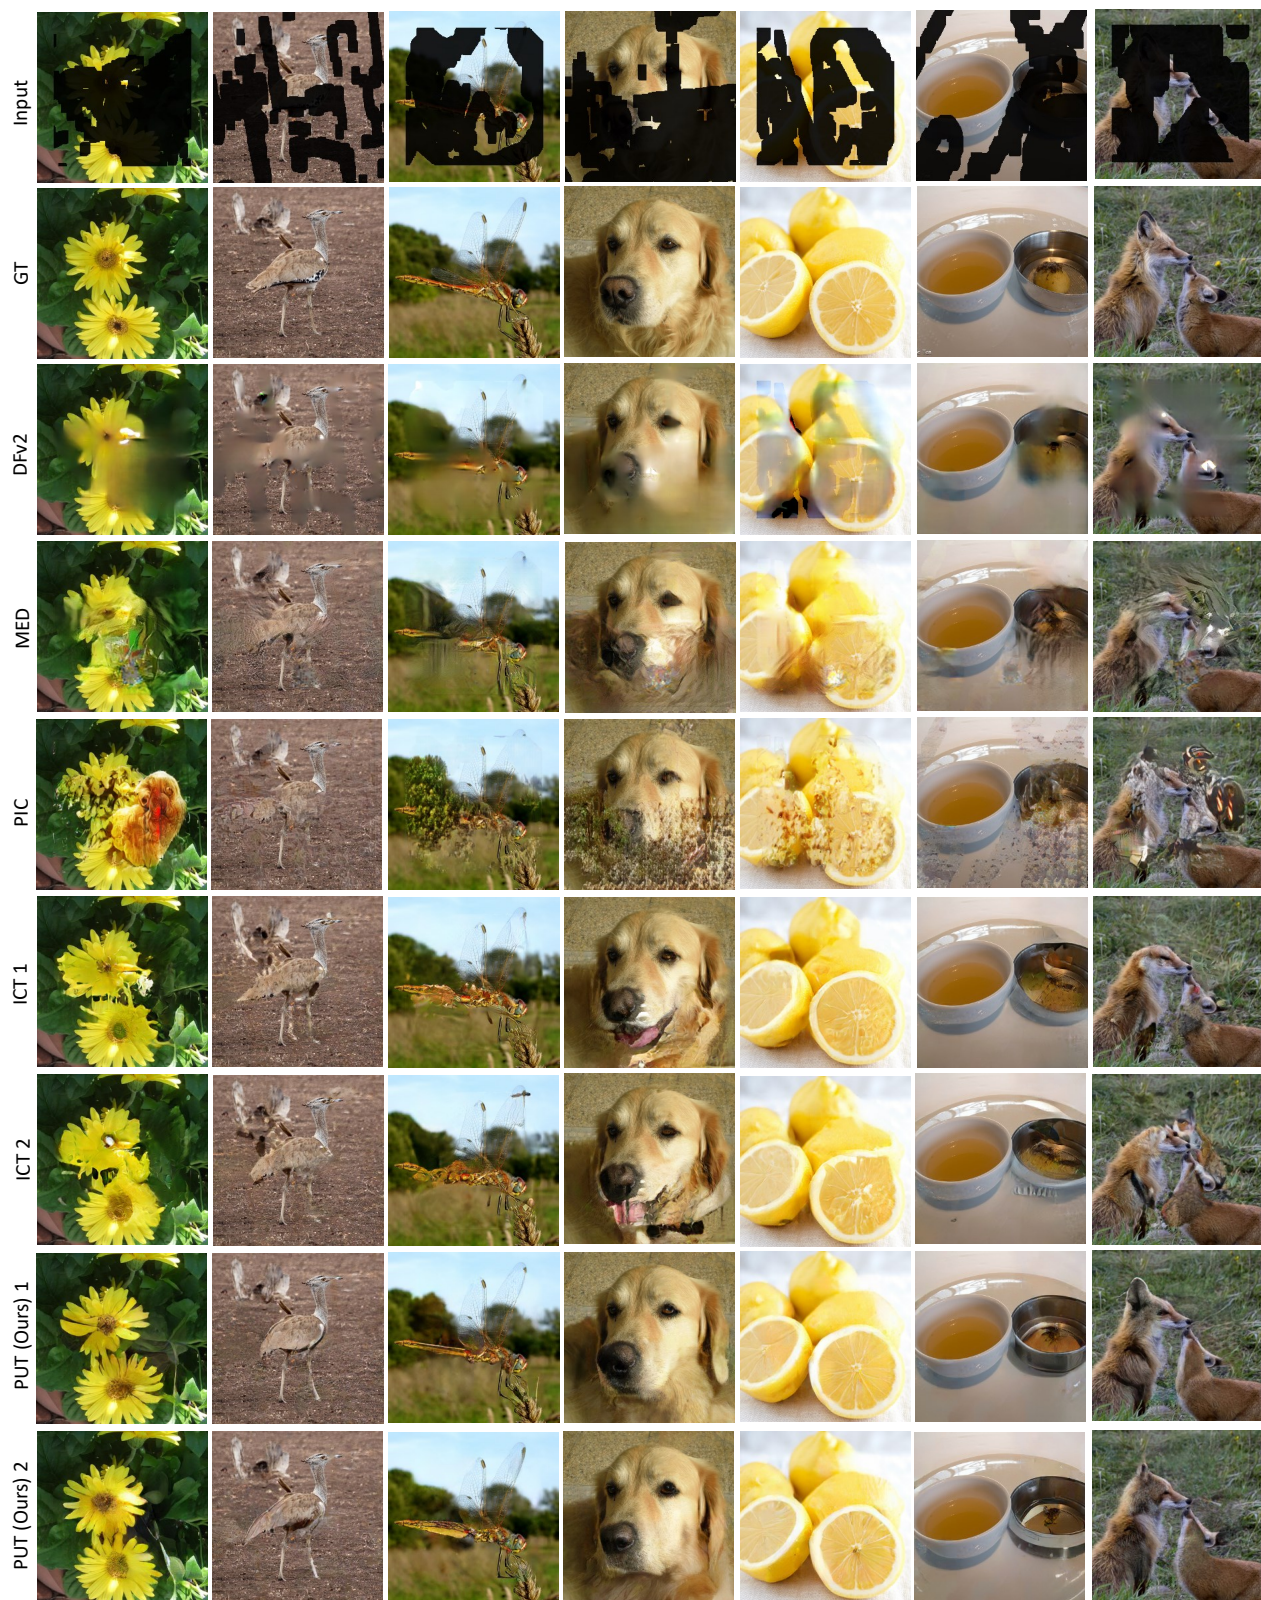

Figure 6. Qualitative comparisons between different methods on ImageNet [2].



## References

- [1] Jimmy Lei Ba, Jamie Ryan Kiros, and Geoffrey E Hinton. Layer normalization. *arXiv preprint arXiv:1607.06450*, 2016. 3
- [2] Jia Deng, Wei Dong, Richard Socher, Li-Jia Li, Kai Li, and Li Fei-Fei. Imagenet: A large-scale hierarchical image database. In *2009 IEEE conference on computer vision and pattern recognition*, pages 248–255. Ieee, 2009. 2, 3, 7, 8
- [3] Patrick Esser, Robin Rombach, and Bjorn Ommer. Taming transformers for high-resolution image synthesis. In *Proceedings of the IEEE/CVF Conference on Computer Vision and Pattern Recognition*, pages 12873–12883, 2021. 2, 3
- [4] Leon A Gatys, Alexander S Ecker, and Matthias Bethge. Image style transfer using convolutional neural networks. In *Proceedings of the IEEE conference on computer vision and pattern recognition*, pages 2414–2423, 2016. 2
- [5] Ian Goodfellow, Jean Pouget-Abadie, Mehdi Mirza, Bing Xu, David Warde-Farley, Sherjil Ozair, Aaron Courville, and Yoshua Bengio. Generative adversarial nets. *Advances in neural information processing systems*, 27, 2014. 2
- [6] Dan Hendrycks and Kevin Gimpel. Gaussian error linear units (gelus). *arXiv preprint arXiv:1606.08415*, 2016. 3
- [7] Justin Johnson, Alexandre Alahi, and Li Fei-Fei. Perceptual losses for real-time style transfer and super-resolution. In *European conference on computer vision*, pages 694–711. Springer, 2016. 2
- [8] Tero Karras, Samuli Laine, and Timo Aila. A style-based generator architecture for generative adversarial networks. In *Proceedings of the IEEE/CVF Conference on Computer Vision and Pattern Recognition*, pages 4401–4410, 2019. 2, 3, 5
- [9] Vinod Nair and Geoffrey E Hinton. Rectified linear units improve restricted boltzmann machines. In *ICML*, 2010. 2, 3
- [10] Kamyar Nazeri, Eric Ng, Tony Joseph, Faisal Qureshi, and Mehran Ebrahimi. Edgeconnect: Structure guided image inpainting using edge prediction. In *Proceedings of the IEEE/CVF International Conference on Computer Vision Workshops*, pages 0–0, 2019. 2
- [11] Alec Radford, Jeffrey Wu, Rewon Child, David Luan, Dario Amodei, Ilya Sutskever, et al. Language models are unsupervised multitask learners. *OpenAI blog*, 1(8):9, 2019. 2
- [12] Aditya Ramesh, Mikhail Pavlov, Gabriel Goh, Scott Gray, Chelsea Voss, Alec Radford, Mark Chen, and Ilya Sutskever. Zero-shot text-to-image generation. *arXiv preprint arXiv:2102.12092*, 2021. 2, 3
- [13] Ali Razavi, Aaron van den Oord, and Oriol Vinyals. Generating diverse high-fidelity images with vq-vae-2. In *Advances in neural information processing systems*, pages 14866–14876, 2019. 1
- [14] Karen Simonyan and Andrew Zisserman. Very deep convolutional networks for large-scale image recognition. *arXiv preprint arXiv:1409.1556*, 2014. 2
- [15] Aaron van den Oord, Oriol Vinyals, and Koray Kavukcuoglu. Neural discrete representation learning. In *Proceedings of the 31st International Conference on Neural Information Processing Systems*, pages 6309–6318, 2017. 1
- [16] Ashish Vaswani, Noam Shazeer, Niki Parmar, Jakob Uszkoreit, Llion Jones, Aidan N Gomez, Łukasz Kaiser, and Illia Polosukhin. Attention is all you need. In *Advances in neural information processing systems*, pages 5998–6008, 2017. 3
- [17] Ziyu Wan, Jingbo Zhang, Dongdong Chen, and Jing Liao. High-fidelity pluralistic image completion with transformers. In *Proceedings of the IEEE/CVF International Conference on Computer Vision*, pages 4692–4701, 2021. 3
- [18] Bolei Zhou, Agata Lapedriza, Aditya Khosla, Aude Oliva, and Antonio Torralba. Places: A 10 million image database for scene recognition. *IEEE transactions on pattern analysis and machine intelligence*, 40(6):1452–1464, 2017. 2, 3, 6
